# Supplementary material
Source: PubMed Central journal article supplement (PMC4578703)
Supplement: NIHMS722632-supplement-MATERIALS.pdf [file NIHMS722632-supplement-MATERIALS.pdf]

**Supplemental Figure.** Comparison of serum biomarkers for a subset of non-EoE controls (n=17) at baseline (black bars) and at follow-up at least 2 months later (white bars). These biomarkers remained stable over time. The top of the bars represent the mean biomarker values, and the error bars represent the standard deviation. The y axis is on a log scale, and all concentrations are in pg/mL with the exception of major basic protein (MBP) which is in ng/mL.

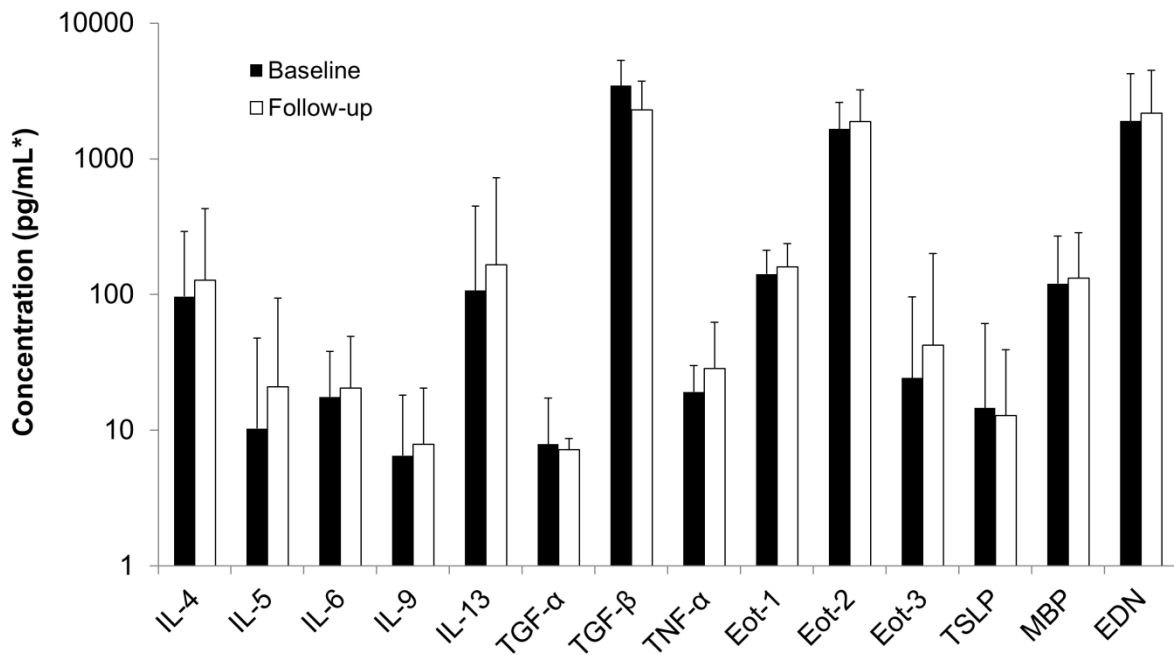

\*concentration for MBP is ng/mL

**Supplemental Table: Tissue staining for inflammatory markers in a subset of EoE cases and non-EoE controls**

|                                                                          | EoE cases<br>(n = 18) | Non-EoE controls<br>(n = 17) | p*      |
|--------------------------------------------------------------------------|-----------------------|------------------------------|---------|
| Tissue biomarker [median staining density (cells/mm <sup>2</sup> ), IQR] |                       |                              |         |
| Major basic protein                                                      | 950 (340-2262)        | 5 (1-114)                    | < 0.001 |
| Eotaxin-3                                                                | 93 (59-628)           | 17 (7-28)                    | < 0.001 |
| Mast cell tryptase                                                       | 230 (166-337)         | 22 (11-47)                   | < 0.001 |

\* Cases and controls compared with Wilcoxon Rank-sum
